# Supplementary material for: Genome-wide study of a Neolithic Wartberg grave community reveals distinct HLA variation and hunter-gatherer ancestry
Source: PubMed Central journal article supplement (PMC7835224; doi:10.1038/s42003-020-01627-4), 2021-01-25
Supplement: 42003_2020_1627_MOESM2_ESM.pdf [file 42003_2020_1627_MOESM2_ESM.pdf]

## **Supplementary Information**

### **Genome-wide study of a Neolithic Wartberg grave community reveals distinct HLA variation and hunter-gatherer ancestry**

Alexander Immel, Federica Pierini, Christoph Rinne, John Meadows, Rodrigo Barquera, András Szolek, Julian Susat, Lisa Böhme, Janina Dose, Joanna Bonczarowska, Clara Drummer, Katharina Fuchs, David Ellinghaus, Jan Christian Kässens, Martin Furholt, Oliver Kohlbacher, Sabine Schade-Lindig, Andre Franke, Stefan Schreiber, Johannes Krause, Johannes Müller, Tobias L. Lenz, Almut Nebel, Ben Krause-Kyora

## Radiocarbon dating

Twenty-five of the aDNA samples were dated by radiocarbon ( $^{14}\text{C}$ ) at the Leibniz-Laboratory for AMS Dating and Stable Isotope Research, Kiel University, Kiel, Germany. Bone was crushed, ultrasonicated in acetone, and rinsed repeatedly in demineralized water, before collagen was extracted<sup>1</sup>: bone was demineralized at room temperature in 1% HCl, rinsed and then treated with 1% NaOH (1 h, 60°C) to dissolve secondary organic compounds, rinsed again and re-acidified. The resulting collagen was dissolved in a weakly acidic solution (14 h, 72° C) and filtered through pre-baked 4.5  $\mu\text{m}$  silver filters, before freeze-drying. In a sealed quartz tube, some collagen was combusted to  $\text{CO}_2$ , which was reduced to graphite and measured by Accelerator Mass Spectrometry (AMS)<sup>2,3</sup>. Collagen %C, %N, and the dietary stable isotopes  $\delta^{13}\text{C}$  and  $\delta^{15}\text{N}$  were measured by Elemental Analysis-Isotope Ratio Mass Spectrometry (EA-IRMS) at isolab GmbH, Schweitenkirchen, Germany<sup>4</sup>.

All samples gave good yields (>1% by weight) of collagen whose atomic C/N ratio was close to the expected value (3.16–3.32)<sup>5</sup>. These data support the validity of the  $^{14}\text{C}$  results (Supplementary Table 1). The  $^{14}\text{C}$  ages, although tightly clustered, are not statistically consistent with a single  $^{14}\text{C}$  age ( $T=51.1$ ,  $T'(5\%)=36.4$ ,  $df=24$ )<sup>6</sup>, so it is unlikely that these 25 individuals were exactly contemporaneous.

Human  $^{14}\text{C}$  ages can be misleadingly old, due to consumption of fish and other aquatic taxa ('dietary  $^{14}\text{C}$  reservoir effects')<sup>7</sup>. The tight clustering of  $^{14}\text{C}$  ages is difficult to reconcile with significant reservoir effects, however, and  $^{14}\text{C}$  ages appear to be independent of  $\delta^{13}\text{C}$  and  $\delta^{15}\text{N}$  (Supplementary Fig. 1). The  $\delta^{13}\text{C}$  values are all compatible with terrestrial diets, based on the  $\text{C}_3$  photosynthetic pathway. Some  $\delta^{15}\text{N}$  values are relatively high (> 12 ‰), but in these cases the bone sampled was the pars petrosa, which undergoes little remodeling over a person's lifetime; petrous bone  $\delta^{13}\text{C}$  and  $\delta^{15}\text{N}$  values therefore reflect diet in early childhood<sup>8</sup>.  $\delta^{15}\text{N}$

variation among petrous bone samples probably reflects (in part) differences in weaning age. Moreover, petrous bone and dentine collagen forms over perhaps 2-3 years at most, whereas  $\delta^{13}\text{C}$  and  $\delta^{15}\text{N}$  values from adult crania (samples KH150203, KH150287, KH150288, KH150289) represent average diets over the last 1-2 decades of life. These four samples, which gave some of the highest  $^{14}\text{C}$  ages, appear to represent almost identical, terrestrial-based diets (Supplementary Fig. 1). We therefore believe that the risk of significant dietary reservoir effects is negligible.

Individually, the  $^{14}\text{C}$  ages date all 25 burials to the calibration plateau spanning the last third of the 4th millennium cal BC<sup>9,10</sup>. Supplementary Fig. 2 uses a kernel-density estimation model to summarize the dates<sup>11</sup>, which suggests that most, if not all individuals, could date to the 33<sup>rd</sup> century (3300–3200 cal BC).

## Admixture dating

### ALDER linkage disequilibrium decay rates for Anatolia Neolithic and Koros Hungary EN HG:

---- fit on data from 1.00 to 50.00 cM (unconstrained affine term) ----

d>1.00 decay: 20.80 +/- 4.03 z = 5.16 \*  
d>1.00 amp\_tot: 0.00018393 +/- 0.00002653  
d>1.00 amp\_exp: 0.00017777 +/- 0.00002584 z = 6.88 \*  
d>1.00 amp\_aff: 0.00001231 +/- 0.00000353

---- fit on data from 1.10 to 50.00 cM (unconstrained affine term) ----

d>1.10 decay: 19.38 +/- 3.94 z = 4.92 \*  
d>1.10 amp\_tot: 0.00017330 +/- 0.00002605  
d>1.10 amp\_exp: 0.00016738 +/- 0.00002536 z = 6.60 \*  
d>1.10 amp\_aff: 0.00001184 +/- 0.00000357

---- fit on data from 1.20 to 50.00 cM (unconstrained affine term) ----

d>1.20 decay: 19.27 +/- 4.09 z = 4.71 \*  
d>1.20 amp\_tot: 0.00017241 +/- 0.00002681  
d>1.20 amp\_exp: 0.00016651 +/- 0.00002628 z = 6.33 \*  
d>1.20 amp\_aff: 0.00001180 +/- 0.00000346

---- fit on data from 1.30 to 50.00 cM (unconstrained affine term) ----

d>1.30 decay: 18.80 +/- 4.11 z = 4.58 \*  
d>1.30 amp\_tot: 0.00016879 +/- 0.00002769  
d>1.30 amp\_exp: 0.00016298 +/- 0.00002711 z = 6.01 \*  
d>1.30 amp\_aff: 0.00001163 +/- 0.00000351

---- fit on data from 1.40 to 50.00 cM (unconstrained affine term) ----

d>1.40 decay: 19.41 +/- 4.53 z = 4.29 \*  
d>1.40 amp\_tot: 0.00017358 +/- 0.00003022  
d>1.40 amp\_exp: 0.00016765 +/- 0.00002951 z = 5.68 \*  
d>1.40 amp\_aff: 0.00001185 +/- 0.00000359

### ALDER linkage disequilibrium decay rates for Anatolia Neolithic and Bichon HG:

---- fit on data from 1.00 to 50.00 cM (unconstrained affine term) ----

d>1.00 decay: 19.00 +/- 3.40 z = 5.59 \*  
d>1.00 amp\_tot: 0.00023442 +/- 0.00002464  
d>1.00 amp\_exp: 0.00022666 +/- 0.00002401 z = 9.44 \*  
d>1.00 amp\_aff: 0.00001551 +/- 0.00000484

---- fit on data from 1.10 to 50.00 cM (unconstrained affine term) ----

d>1.10 decay: 18.49 +/- 3.31 z = 5.58 \*  
d>1.10 amp\_tot: 0.00022908 +/- 0.00002497  
d>1.10 amp\_exp: 0.00022145 +/- 0.00002432 z = 9.11 \*  
d>1.10 amp\_aff: 0.00001526 +/- 0.00000486

---- fit on data from 1.20 to 50.00 cM (unconstrained affine term) ----

d>1.20 decay: 18.11 +/- 3.43 z = 5.27 \*  
d>1.20 amp\_tot: 0.00022495 +/- 0.00002699  
d>1.20 amp\_exp: 0.00021742 +/- 0.00002637 z = 8.24 \*  
d>1.20 amp\_aff: 0.00001506 +/- 0.00000486

---- fit on data from 1.30 to 50.00 cM (unconstrained affine term) ----

d>1.30 decay: 17.42 +/- 3.42 z = 5.09 \*

d>1.30 amp\_tot: 0.00021747 +/- 0.00002751  
d>1.30 amp\_exp: 0.00021012 +/- 0.00002682 z = 7.83 \*  
d>1.30 amp\_aff: 0.00001470 +/- 0.00000492

---- fit on data from 1.40 to 50.00 cM (unconstrained affine term) ----

d>1.40 decay: 16.86 +/- 3.45 z = 4.89 \*  
d>1.40 amp\_tot: 0.00021114 +/- 0.00002780  
d>1.40 amp\_exp: 0.00020394 +/- 0.00002691 z = 7.58 \*  
d>1.40 amp\_aff: 0.00001440 +/- 0.00000505

#### ALDER linkage disequilibrium decay rates for Anatolia Neolithic and Serbia HG:

---- fit on data from 1.00 to 50.00 cM (unconstrained affine term) ----

d>1.00 decay: 15.31 +/- 2.43 z = 6.29 \*  
d>1.00 amp\_tot: 0.00013279 +/- 0.00001396  
d>1.00 amp\_exp: 0.00012896 +/- 0.00001392 z = 9.27 \*  
d>1.00 amp\_aff: 0.00000766 +/- 0.00000375

---- fit on data from 1.10 to 50.00 cM (unconstrained affine term) ----

d>1.10 decay: 14.74 +/- 2.46 z = 5.99 \*  
d>1.10 amp\_tot: 0.00012882 +/- 0.00001344  
d>1.10 amp\_exp: 0.00012513 +/- 0.00001338 z = 9.35 \*  
d>1.10 amp\_aff: 0.00000738 +/- 0.00000379

---- fit on data from 1.20 to 50.00 cM (unconstrained affine term) ----

d>1.20 decay: 14.54 +/- 2.62 z = 5.55 \*  
d>1.20 amp\_tot: 0.00012745 +/- 0.00001392  
d>1.20 amp\_exp: 0.00012381 +/- 0.00001374 z = 9.01 \*  
d>1.20 amp\_aff: 0.00000728 +/- 0.00000386

---- fit on data from 1.30 to 50.00 cM (unconstrained affine term) ----

d>1.30 decay: 14.24 +/- 2.73 z = 5.21 \*  
d>1.30 amp\_tot: 0.00012531 +/- 0.00001454  
d>1.30 amp\_exp: 0.00012174 +/- 0.00001420 z = 8.57 \*  
d>1.30 amp\_aff: 0.00000713 +/- 0.00000396

---- fit on data from 1.40 to 50.00 cM (unconstrained affine term) ----

d>1.40 decay: 14.36 +/- 2.86 z = 5.02 \*  
d>1.40 amp\_tot: 0.00012615 +/- 0.00001614  
d>1.40 amp\_exp: 0.00012256 +/- 0.00001578 z = 7.77 \*  
d>1.40 amp\_aff: 0.00000719 +/- 0.00000396

#### ALDER linkage disequilibrium decay rates for Anatolia Neolithic and Iron Gates HG:

---- fit on data from 1.20 to 50.00 cM (unconstrained affine term) ----

d>1.20 decay: 14.44 +/- 1.65 z = 8.78 \*  
d>1.20 amp\_tot: 0.00013828 +/- 0.00000954  
d>1.20 amp\_exp: 0.00013465 +/- 0.00000932 z = 14.45 \*  
d>1.20 amp\_aff: 0.00000726 +/- 0.00000216

---- fit on data from 1.30 to 50.00 cM (unconstrained affine term) ----

d>1.30 decay: 13.96 +/- 1.64 z = 8.51 \*  
d>1.30 amp\_tot: 0.00013466 +/- 0.00000977  
d>1.30 amp\_exp: 0.00013117 +/- 0.00000953 z = 13.77 \*  
d>1.30 amp\_aff: 0.00000697 +/- 0.00000219

---- fit on data from 1.40 to 50.00 cM (unconstrained affine term) ----

d>1.40 decay: 13.77 +/- 1.66 z = 8.32 \*  
d>1.40 amp\_tot: 0.00013319 +/- 0.00001000  
d>1.40 amp\_exp: 0.00012976 +/- 0.00000973 z = 13.34 \*  
d>1.40 amp\_aff: 0.00000686 +/- 0.00000221

---- fit on data from 1.50 to 50.00 cM (unconstrained affine term) ----

d>1.50 decay: 13.26 +/- 1.55 z = 8.55 \*  
d>1.50 amp\_tot: 0.00012924 +/- 0.00000953  
d>1.50 amp\_exp: 0.00012597 +/- 0.00000927 z = 13.58 \*  
d>1.50 amp\_aff: 0.00000653 +/- 0.00000223

---- fit on data from 1.60 to 50.00 cM (unconstrained affine term) ----

d>1.60 decay: 13.00 +/- 1.53 z = 8.50 \*  
d>1.60 amp\_tot: 0.00012727 +/- 0.00000970  
d>1.60 amp\_exp: 0.00012409 +/- 0.00000941 z = 13.19 \*  
d>1.60 amp\_aff: 0.00000637 +/- 0.00000226

#### ALDER linkage disequilibrium decay rates for Anatolia Neolithic and Iberia HG:

---- fit on data from 1.00 to 50.00 cM (unconstrained affine term) ----

d>1.00 decay: 18.06 +/- 4.15 z = 4.35 \*  
d>1.00 amp\_tot: 0.00016610 +/- 0.00002088  
d>1.00 amp\_exp: 0.00016126 +/- 0.00001984 z = 8.13 \*  
d>1.00 amp\_aff: 0.00000968 +/- 0.00000372

---- fit on data from 1.10 to 50.00 cM (unconstrained affine term) ----

d>1.10 decay: 17.66 +/- 4.37 z = 4.05 \*  
d>1.10 amp\_tot: 0.00016305 +/- 0.00002265  
d>1.10 amp\_exp: 0.00015829 +/- 0.00002155 z = 7.35 \*  
d>1.10 amp\_aff: 0.00000952 +/- 0.00000381

---- fit on data from 1.20 to 50.00 cM (unconstrained affine term) ----

d>1.20 decay: 17.49 +/- 4.44 z = 3.94 \*  
d>1.20 amp\_tot: 0.00016171 +/- 0.00002342  
d>1.20 amp\_exp: 0.00015699 +/- 0.00002226 z = 7.05 \*  
d>1.20 amp\_aff: 0.00000945 +/- 0.00000388

---- fit on data from 1.30 to 50.00 cM (unconstrained affine term) ----

d>1.30 decay: 17.12 +/- 4.58 z = 3.74 \*  
d>1.30 amp\_tot: 0.00015881 +/- 0.00002412  
d>1.30 amp\_exp: 0.00015416 +/- 0.00002271 z = 6.79 \*  
d>1.30 amp\_aff: 0.00000930 +/- 0.00000407

---- fit on data from 1.40 to 50.00 cM (unconstrained affine term) ----

d>1.40 decay: 16.92 +/- 4.66 z = 3.63 \*  
d>1.40 amp\_tot: 0.00015717 +/- 0.00002500  
d>1.40 amp\_exp: 0.00015257 +/- 0.00002350 z = 6.49 \*  
d>1.40 amp\_aff: 0.00000921 +/- 0.00000417

#### ALDER linkage disequilibrium decay rates for Anatolia Neolithic and WHG:

---- fit on data from 1.00 to 50.00 cM (unconstrained affine term) ----

d>1.00 decay: 16.92 +/- 1.64 z = 10.30 \*  
d>1.00 amp\_tot: 0.00019322 +/- 0.00001625  
d>1.00 amp\_exp: 0.00018754 +/- 0.00001669 z = 11.23 \*

d>1.00 amp\_aff: 0.00001136 +/- 0.00000259

---- fit on data from 1.10 to 50.00 cM (unconstrained affine term) ----

d>1.10 decay: 16.08 +/- 1.45 z = 11.05 \*  
d>1.10 amp\_tot: 0.00018517 +/- 0.00001579  
d>1.10 amp\_exp: 0.00017972 +/- 0.00001625 z = 11.06 \*  
d>1.10 amp\_aff: 0.00001090 +/- 0.00000260

---- fit on data from 1.20 to 50.00 cM (unconstrained affine term) ----

d>1.20 decay: 15.39 +/- 1.37 z = 11.24 \*  
d>1.20 amp\_tot: 0.00017843 +/- 0.00001540  
d>1.20 amp\_exp: 0.00017318 +/- 0.00001584 z = 10.94 \*  
d>1.20 amp\_aff: 0.00001050 +/- 0.00000263

---- fit on data from 1.30 to 50.00 cM (unconstrained affine term) ----

d>1.30 decay: 14.94 +/- 1.36 z = 10.96 \*  
d>1.30 amp\_tot: 0.00017394 +/- 0.00001537  
d>1.30 amp\_exp: 0.00016883 +/- 0.00001580 z = 10.69 \*  
d>1.30 amp\_aff: 0.00001023 +/- 0.00000263

---- fit on data from 1.40 to 50.00 cM (unconstrained affine term) ----

d>1.40 decay: 14.98 +/- 1.37 z = 10.92 \*  
d>1.40 amp\_tot: 0.00017433 +/- 0.00001528  
d>1.40 amp\_exp: 0.00016920 +/- 0.00001572 z = 10.76 \*  
d>1.40 amp\_aff: 0.00001026 +/- 0.00000263

ALDER linkage disequilibrium decay rates for Anatolia Neolithic and Loschbour HG:

---- fit on data from 1.00 to 50.00 cM (unconstrained affine term) ----

d>1.00 decay: 14.85 +/- 2.82 z = 5.28 \*  
d>1.00 amp\_tot: 0.00021335 +/- 0.00002318  
d>1.00 amp\_exp: 0.00020647 +/- 0.00002264 z = 9.12 \*  
d>1.00 amp\_aff: 0.00001376 +/- 0.00000548

---- fit on data from 1.10 to 50.00 cM (unconstrained affine term) ----

d>1.10 decay: 14.25 +/- 2.74 z = 5.21 \*  
d>1.10 amp\_tot: 0.00020650 +/- 0.00002296  
d>1.10 amp\_exp: 0.00019986 +/- 0.00002236 z = 8.94 \*  
d>1.10 amp\_aff: 0.00001327 +/- 0.00000558

---- fit on data from 1.20 to 50.00 cM (unconstrained affine term) ----

d>1.20 decay: 13.68 +/- 2.53 z = 5.40 \*  
d>1.20 amp\_tot: 0.00019987 +/- 0.00002147  
d>1.20 amp\_exp: 0.00019348 +/- 0.00002095 z = 9.24 \*  
d>1.20 amp\_aff: 0.00001276 +/- 0.00000561

---- fit on data from 1.30 to 50.00 cM (unconstrained affine term) ----

d>1.30 decay: 13.25 +/- 2.47 z = 5.36 \*  
d>1.30 amp\_tot: 0.00019480 +/- 0.00002137  
d>1.30 amp\_exp: 0.00018861 +/- 0.00002084 z = 9.05 \*  
d>1.30 amp\_aff: 0.00001237 +/- 0.00000567

---- fit on data from 1.40 to 50.00 cM (unconstrained affine term) ----

d>1.40 decay: 13.19 +/- 2.51 z = 5.26 \*  
d>1.40 amp\_tot: 0.00019405 +/- 0.00002266  
d>1.40 amp\_exp: 0.00018789 +/- 0.00002210 z = 8.50 \*  
d>1.40 amp\_aff: 0.00001231 +/- 0.00000569

DATES results for admixture between Anatolian farmers and the following HG populations:

| <b>Pop</b>                  | <b>generations</b> | <b>stedrr</b> |
|-----------------------------|--------------------|---------------|
| OrienteC_HG                 | 51,977             | 19,997        |
| Croatia_Mesolithic_HG       | 30,954             | 8,068         |
| Bichon                      | 20,749             | 4,27          |
| Blatterhohle_MN             | 18,001             | 3,072         |
| Koros_Hungary_EN_HG         | 28,386             | 6,018         |
| Serbia_HG                   | 22,412             | 3,977         |
| Serbia_Mesolithic_Neolithic | 20,339             | 2,842         |
| Narva_LT                    | 17,153             | 2,482         |
| Iron_Gates_HG               | 18,416             | 1,967         |
| Loschbour                   | 16,608             | 2,654         |
| Iberia_HG                   | 22,208             | 3,853         |
| Latvia_EN                   | 27,054             | 7,858         |
| Baalberge_MN                | 9,95               | 55,816        |
| France_MN                   | 94,043             | 19,491        |
| Latvia_HG                   | 18,359             | 2,001         |



**Supplementary Table 1:** AMS and EA-IRMS results from dated bone samples. KIA-53048 is the weighted mean of two graphite targets, which gave consistent  $^{14}\text{C}$  ages ( $4412\pm 24$ ,  $4424\pm 28$ ). EA-IRMS data are average results from four measurements of each sample, with standard deviations  $<0.1\text{ ‰}$  for both isotopes.

| sample   | element | collagen yield % | AMS lab number | $^{14}\text{C}$ age (BP) | atomic C/N | $\delta^{13}\text{C}$ | $\delta^{15}\text{N}$ |
|----------|---------|------------------|----------------|--------------------------|------------|-----------------------|-----------------------|
| KH150203 | cranium | 9.7              | KIA-52267      | 4481±24                  | 3.2        | -20.5                 | 10.9                  |
| KH150287 | cranium | 1.9              | KIA-52268      | 4499±25                  | 3.2        | -20.6                 | 11.4                  |
| KH150288 | cranium | 7.0              | KIA-52269      | 4512±26                  | 3.2        | -20.6                 | 10.5                  |
| KH150289 | cranium | 9.5              | KIA-52270      | 4499±24                  | 3.2        | -20.7                 | 11.0                  |
| KH150422 | tooth   | 12.0             | KIA-52272      | 4538±24                  | 3.2        | -20.4                 | 10.4                  |
| KH150610 | petrous | 11.4             | KIA-52273      | 4532±25                  | 3.2        | -19.7                 | 12.6                  |
| KH150611 | petrous | 3.8              | KIA-53044      | 4518±25                  | 3.2        | -20.7                 | 11.1                  |
| KH150613 | petrous | 5.7              | KIA-53045      | 4499±26                  | 3.2        | -22.0                 | 11.6                  |
| KH150615 | petrous | 6.4              | KIA-53046      | 4462±24                  | 3.1        | -20.8                 | 10.7                  |
| KH150616 | petrous | 5.1              | KIA-52274      | 4492±24                  | 3.2        | -21.3                 | 11.1                  |
| KH150618 | petrous | 4.2              | KIA-52275      | 4468±25                  | 3.2        | -20.5                 | 11.4                  |
| KH150619 | petrous | 9.1              | KIA-52276      | 4455±24                  | 3.2        | -20.7                 | 9.7                   |
| KH150620 | petrous | 5.1              | KIA-53047      | 4491±25                  | 3.2        | -19.7                 | 13.1                  |
| KH150622 | petrous | 8.4              | KIA-53048      | 4417±19                  | 3.1        | -20.4                 | 14.1                  |
| KH150625 | petrous | 5.0              | KIA-52277      | 4497±27                  | 3.2        | -19.8                 | 13.0                  |
| KH150627 | petrous | 2.8              | KIA-52278      | 4462±27                  | 3.2        | -21.1                 | 10.7                  |
| KH150628 | petrous | 9.9              | KIA-53049      | 4448±26                  | 3.1        | -20.3                 | 11.5                  |
| KH150630 | petrous | 5.6              | KIA-53050      | 4564±25                  | 3.2        | -20.4                 | 10.3                  |
| KH150633 | petrous | 7.0              | KIA-52279      | 4486±29                  | 3.2        | -20.3                 | 9.9                   |
| KH150634 | petrous | 8.8              | KIA-53051      | 4507±25                  | 3.2        | -20.4                 | 10.9                  |
| KH150635 | petrous | 9.6              | KIA-52280      | 4425±28                  | 3.2        | -20.6                 | 12.8                  |
| KH150636 | petrous | 4.6              | KIA-53052      | 4493±26                  | 3.2        | -20.4                 | 10.8                  |
| KH150637 | petrous | 4.7              | KIA-52281      | 4432±28                  | 3.2        | -20.6                 | 11.9                  |
| KH150640 | petrous | 6.4              | KIA-53053      | 4461±25                  | 3.2        | -20.8                 | 11.6                  |
| KH150641 | petrous | 7.5              | KIA-52282      | 4473±28                  | 3.2        | -20.4                 | 12.2                  |

**Supplementary Table 2:** Viruses included in the HLA peptide binding prediction analysis reported together with their proteome identifier (UPID) from UniProt databases.

| <b>Viruses</b>               | <b>Proteome identifier (UPID)</b> |
|------------------------------|-----------------------------------|
| Epstein-Barr virus           | UP000153037                       |
| Hepatitis B virus            | UP000007930                       |
| Hepatitis C virus            | UP000000518                       |
| Human immunodeficiency virus | UP000002241                       |
| Human herpesvirus            | UP000006930                       |
| Influenza A virus            | UP000009255                       |
| Measles virus                | UP000008699                       |
| Mumps virus                  | UP000002331                       |
| Rabies virus                 | UP000008649                       |
| Rubella virus                | UP000000571                       |
| Variola virus                | UP000002060                       |

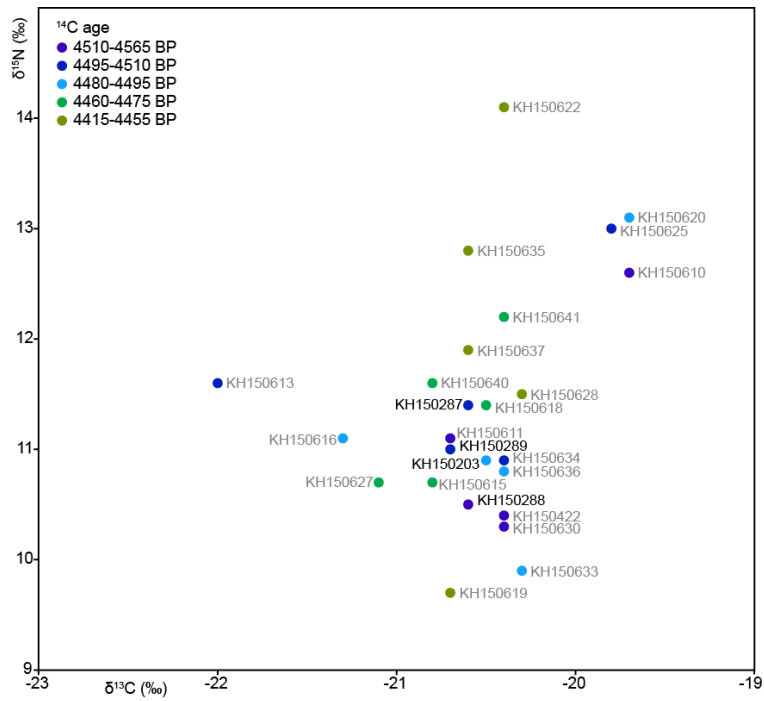

**Supplementary Figure 1:** Dietary stable isotopes from the dated samples (Supplementary Table 1). Colors denote the <sup>14</sup>C ages obtained on the same collagen extracts. Black labels: cranial bone; grey labels: petrous bone, or dentine (KH150422).

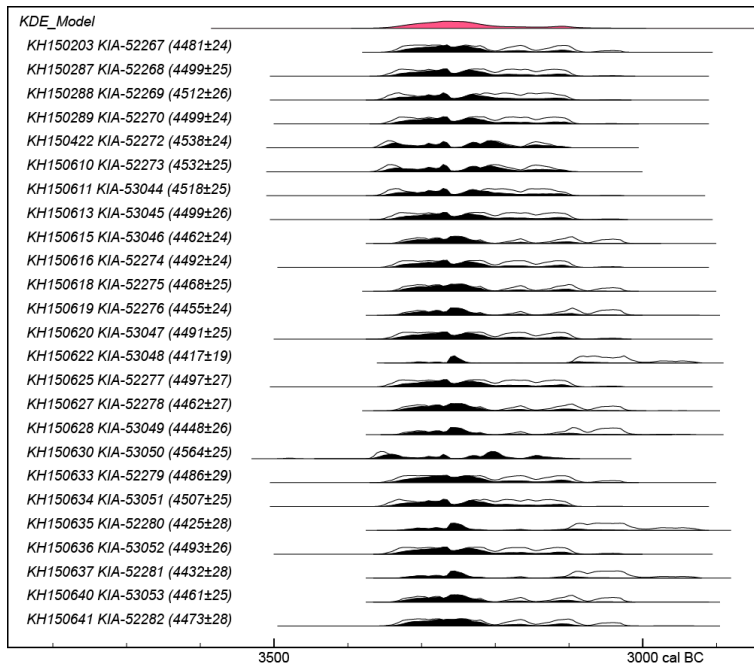

**Supplementary Figure 2:** Calibrated individual <sup>14</sup>C ages (9, 10) (outline distributions) and posterior density estimates for the calendar dates of these samples (solid distributions) obtained using the OxCal function KDE\_Model (11). The pink distribution *KDE\_Model* summarizes the results.

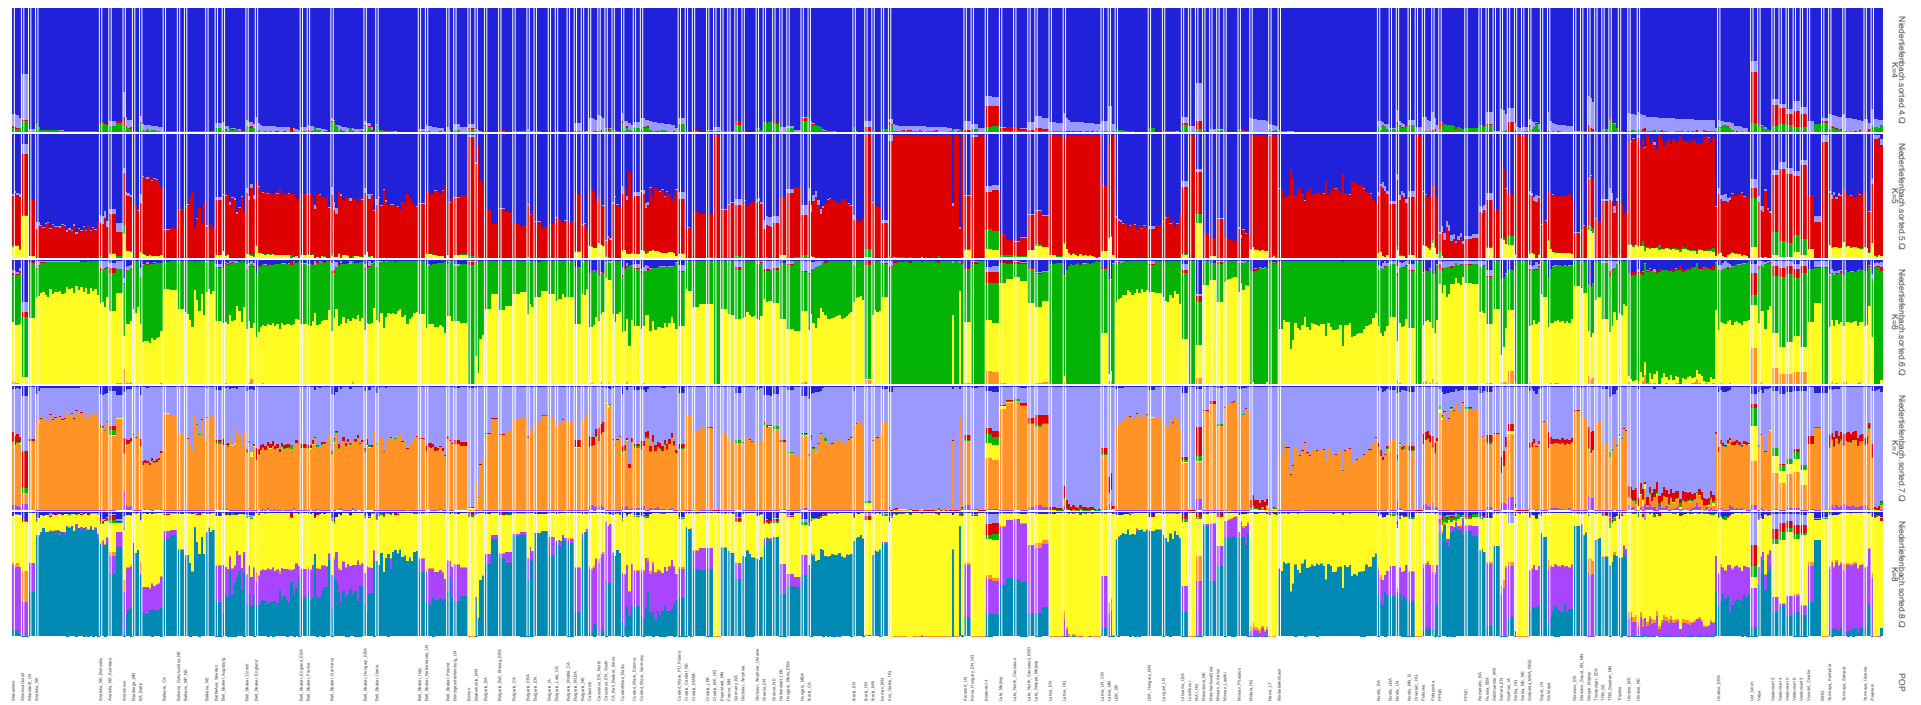

**Supplementary Figure 3:** Unsupervised admixture analysis for K=4, 5, 6, 7 and 8 ancestral genetic components for 123 selected ancient populations/individuals. Modern-day populations were included in the analysis but are not shown. BA=Bronze Age, EBA=Early Bronze Age, EN=Eneolithic, HG=hunter-gatherer, IA=Iron Age, LBA=Late Bronze Age, LBK=Linearbandkeramik, LN=Late Neolithic, M(L)BA=Middle (Late) Bronze Age, MN=Middle Neolithic, PPNA=Pre-Pottery Neolithic A, PPNB=Pre-Pottery Neolithic B, PU=Proto-Unetice, TRB=Trichterbecher (Funnel Beaker Culture, FBC).

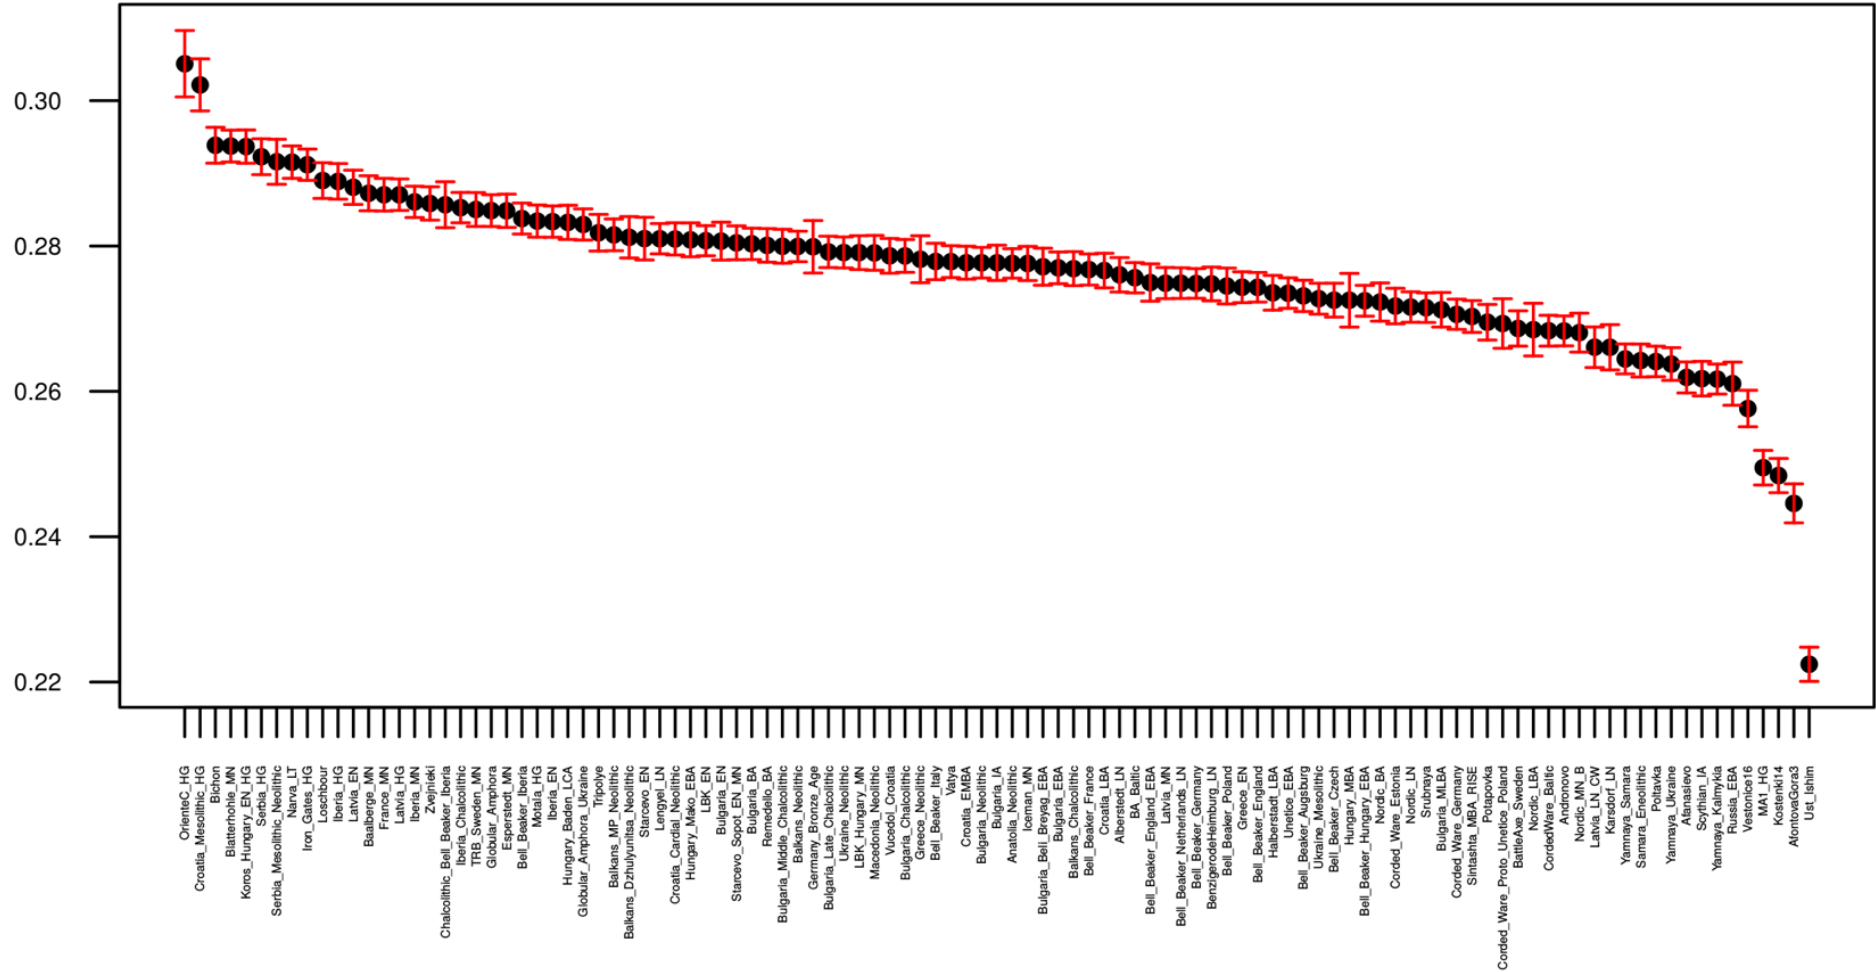

**Supplementary Figure 4:**  $f_3$ -outgroup statistics  $f_3(\text{Niedertiefenbach}; \text{Test}, \text{Mbuti})$  showing the amount of shared genetic drift between Niedertiefenbach and previously published ancient populations/individuals. EBA=Early Bronze Age, EN=Eneolithic, HG=hunter-gatherer, IA=Iron Age, LBA=Late Bronze Age, LBK=Linearbandkeramik, LN=Late Neolithic, M(L)BA=Middle (Late) Bronze Age, MN=Middle Neolithic, PU=Proto-Unetice, TRB=Trichterbecher (Funnel Beaker Culture, FBC).

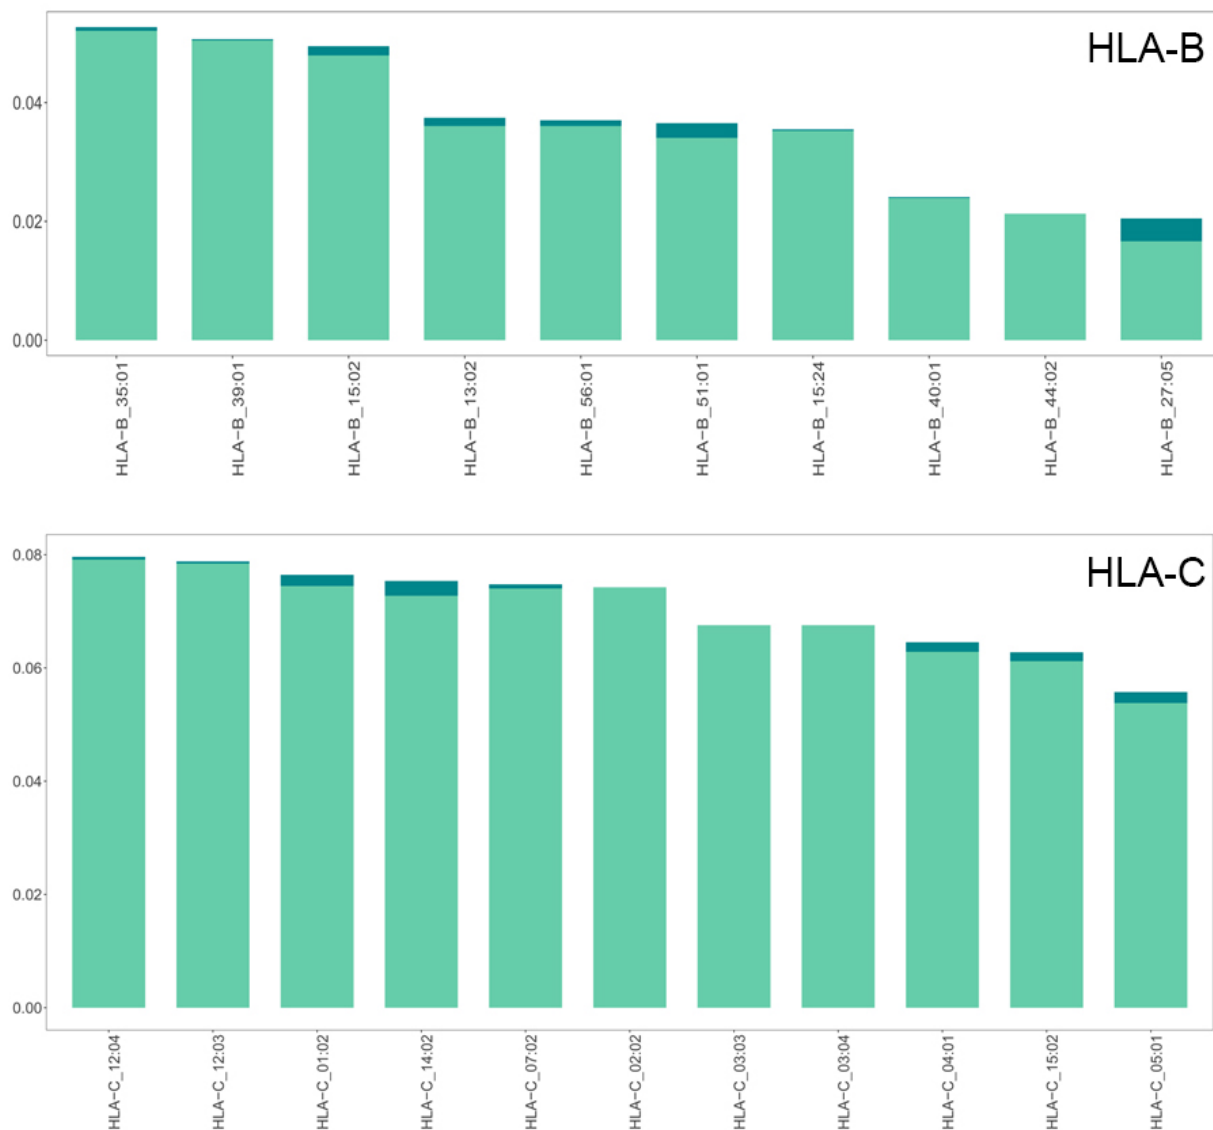

**Supplementary Figure 5:** Computationally predicted fraction of viral peptides (N = 164,037) bound by the HLA-B and HLA-C alleles observed in the Niedertiefenbach individuals. Total fraction (light green) as well as unique fraction (peptides uniquely bound by this allele, dark green) are shown. For estimation of unique binding, all 58 HLA-B and 29 HLA-C alleles observed in this study (including both ancient and modern samples) were analyzed. See Supplementary Table 2 for list of included viruses.

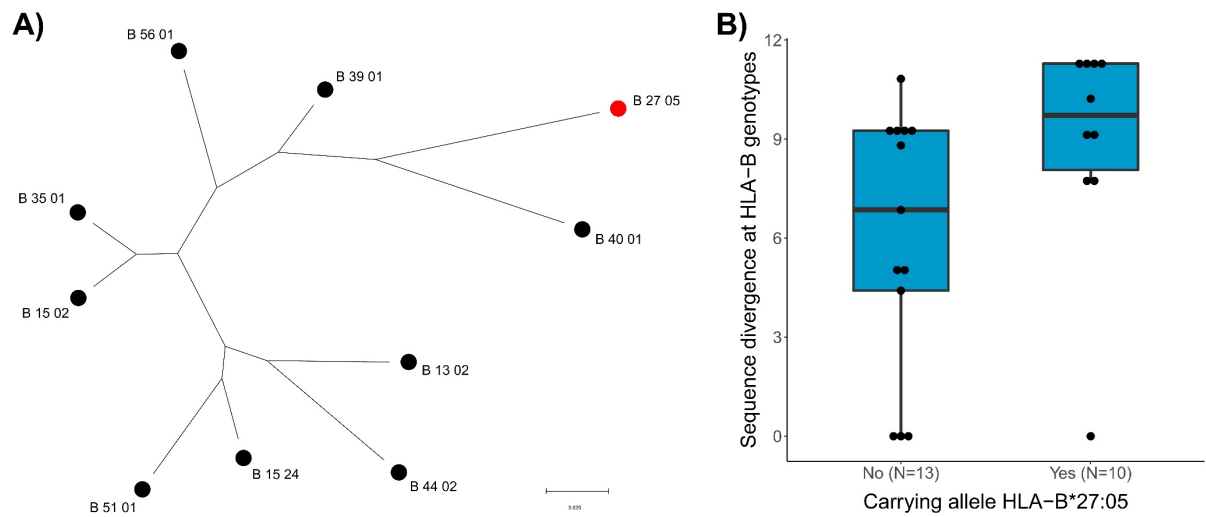

**Supplementary Figure 6:** Amino acid sequence divergence at HLA-B. **A)** Phylogenetic relationship of the 10 HLA-B alleles observed among Niedertiefenbach individuals. Maximum-likelihood tree based on amino acid sequence (HLA-B\*27:05 marked in red). **B)** Comparison of HLA-B amino acid allele divergence between Niedertiefenbach individuals with and without the allele HLA-B\*27:05 (MWUtest,  $P = 0.061$ )



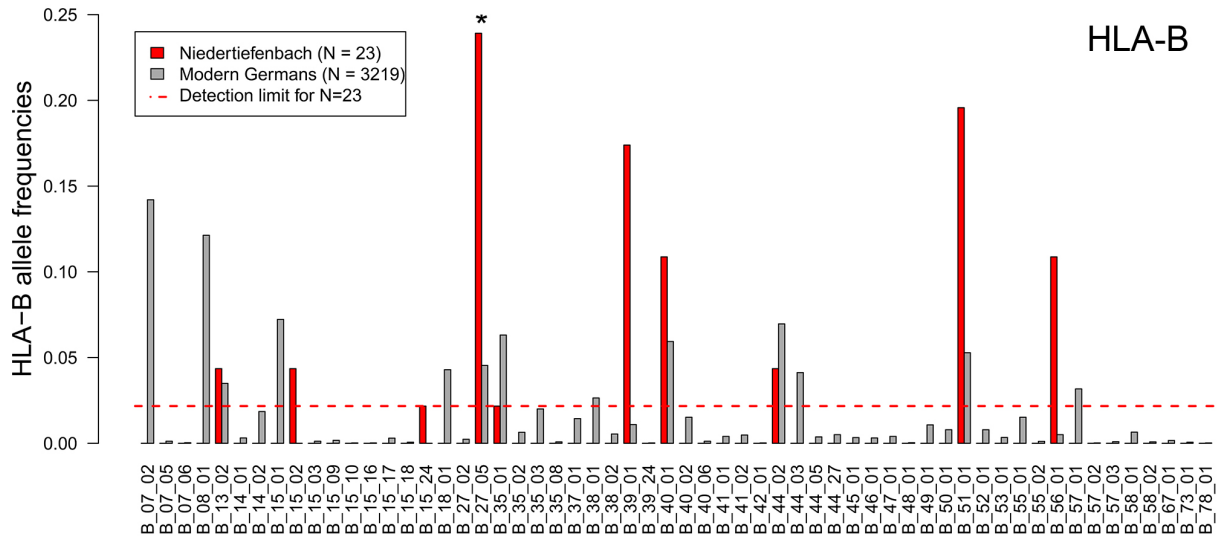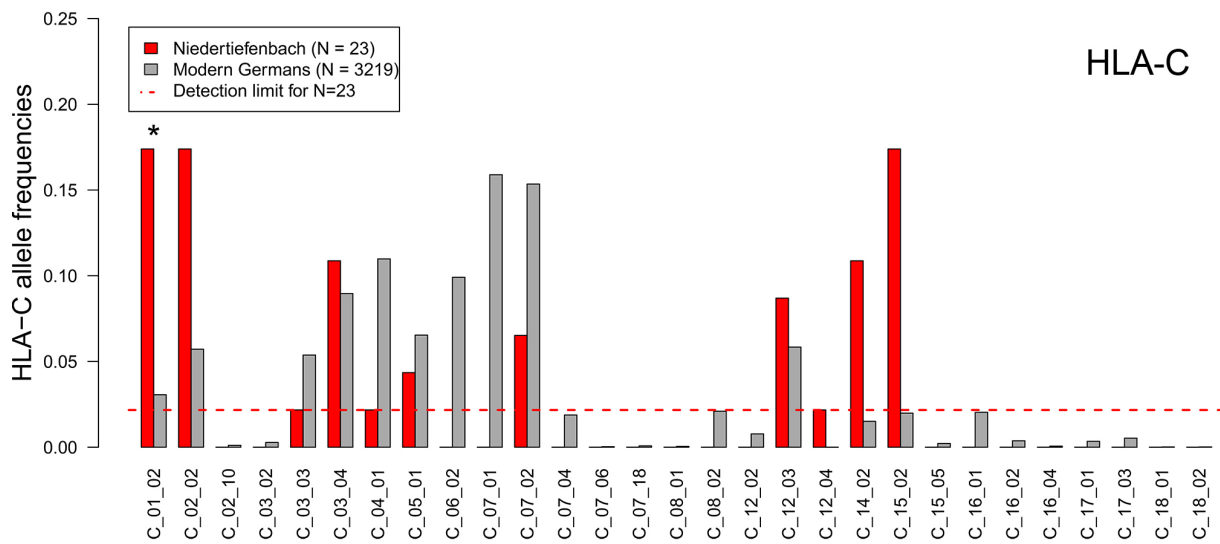

**Supplementary Figure 7:** Allele frequencies in the Niedertiefenbach individuals (N = 23, red) and a modern German cohort of healthy individuals (N = 3,219) for HLA-B and HLA-C. The dashed red line indicates the detection limit for rare alleles with a sample size of N = 23.

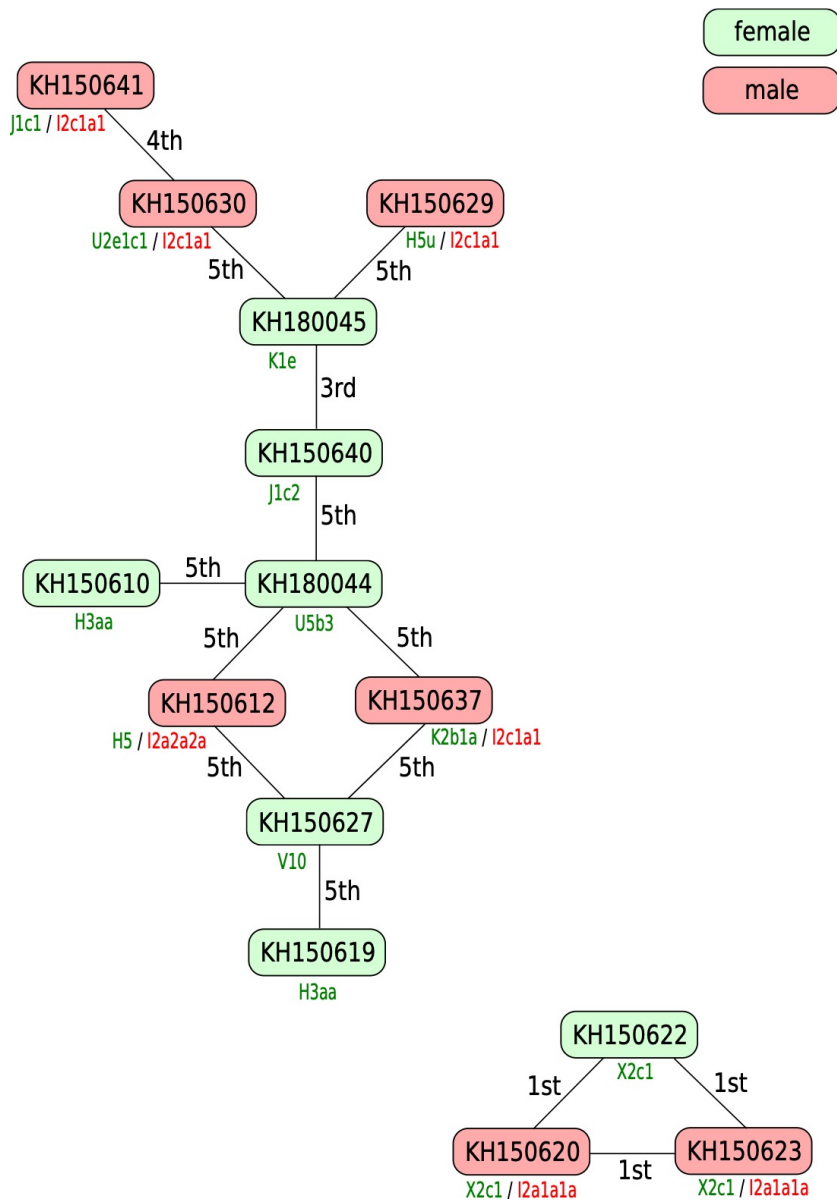

**Supplementary Figure 8:** Kinship analysis estimating the degree of relatedness among the 42 Niedertiefenbach individuals. Those individuals not shown are unrelated to any of the others. Mitochondrial haplotypes are depicted in green, Y haplotypes in red.

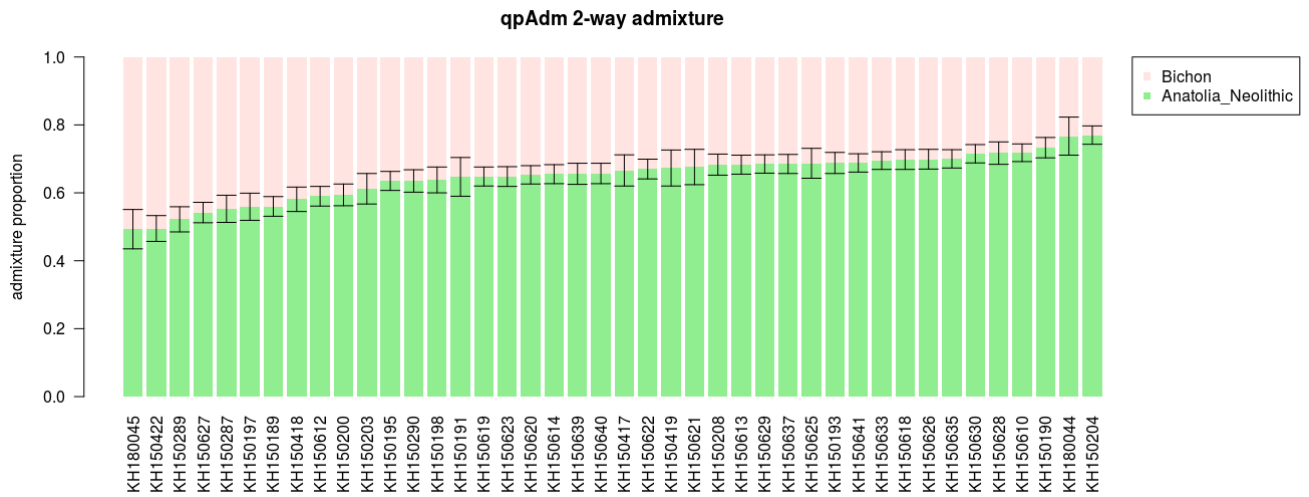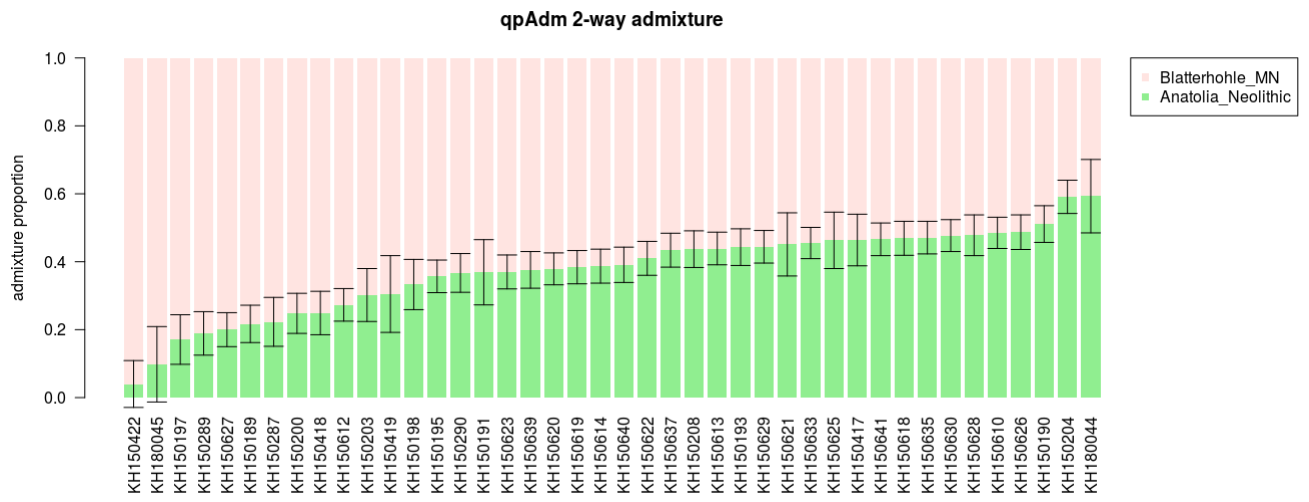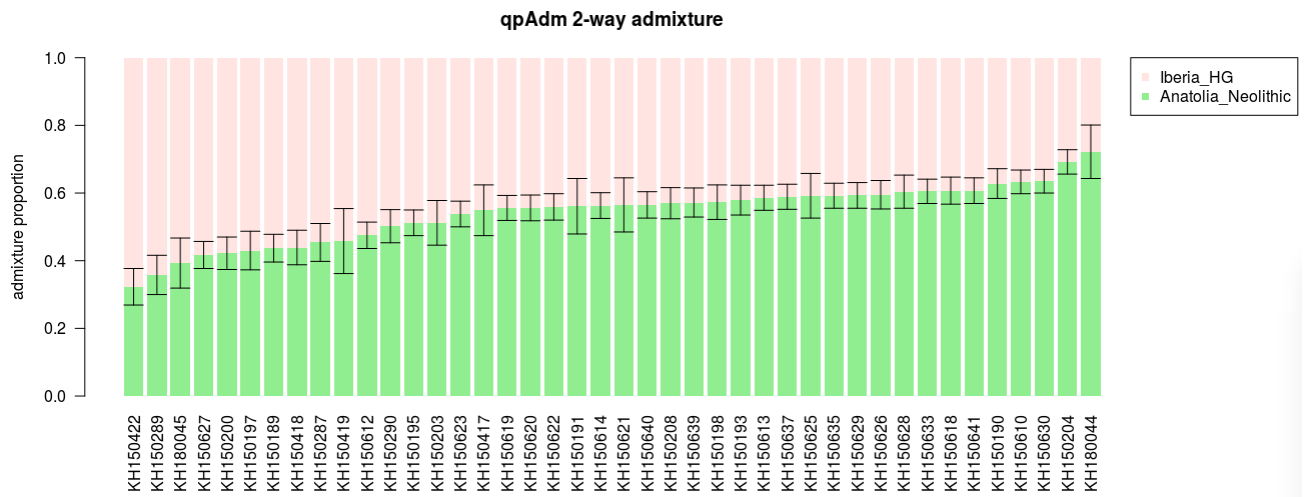

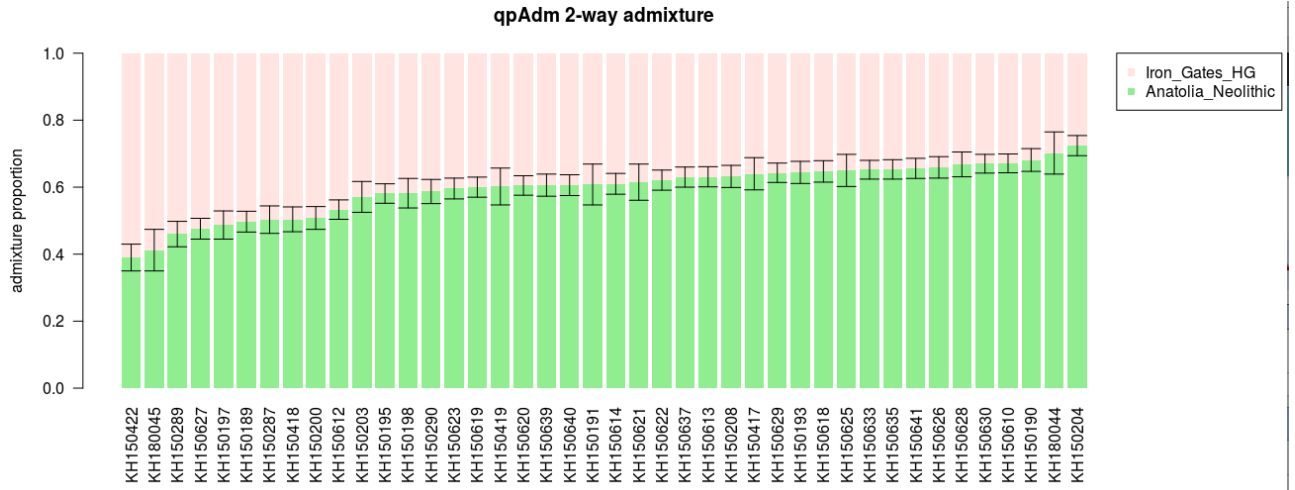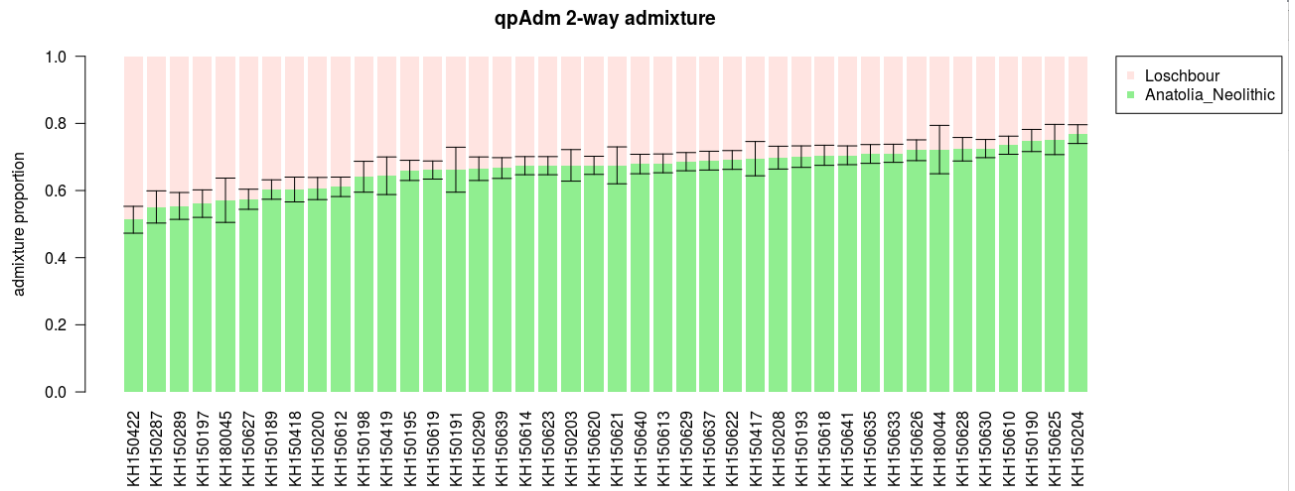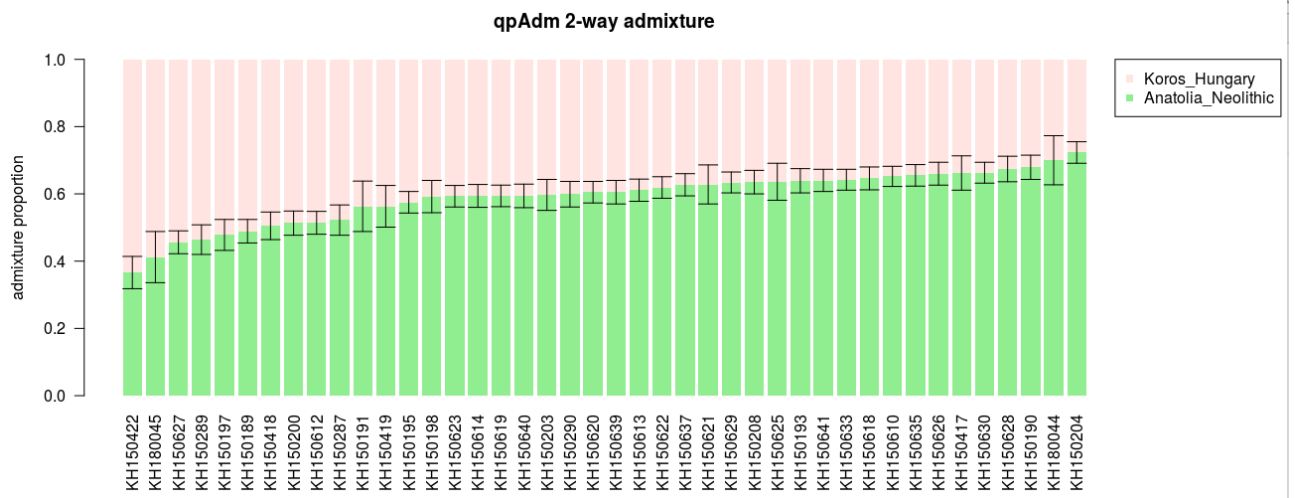

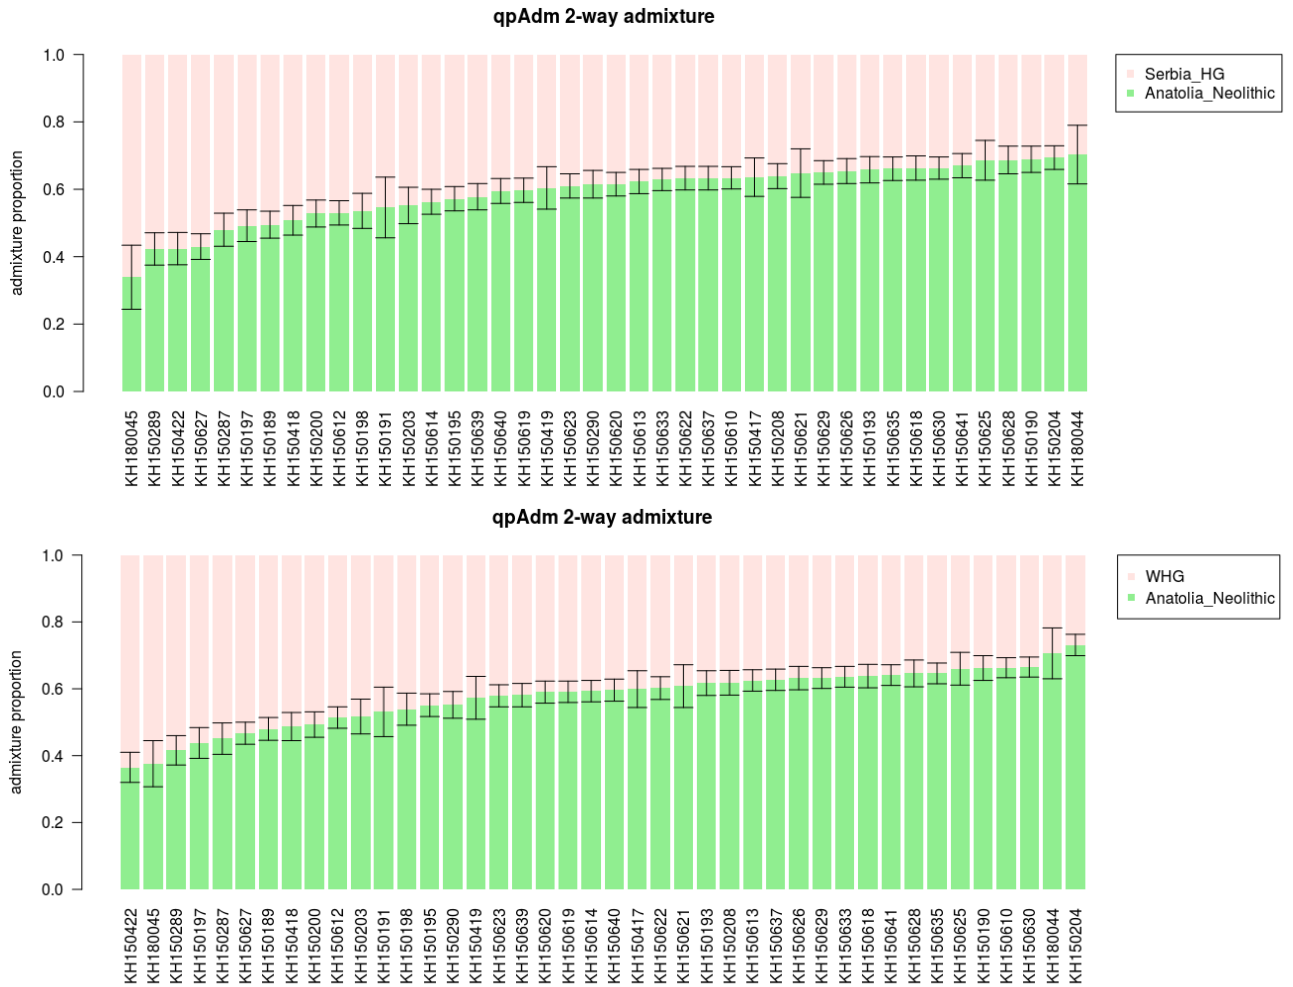

**Supplementary Figure 9:** Results of the qpAdm 2-way models for each Niedertiefenbach individual (x-axis). Bar plots show the estimated admixture proportions (y-axis) of Anatolia\_Neolithic (green) and different HG populations (pink). Bars indicate standard errors provided by qpAdm.



## References

1. Longin, R. New method of collagen extraction for radiocarbon dating. *Nature* **230**: 241-242 (1971).
2. Nadeau M-J. *et al.* Sample throughput and data quality at the Leibniz-Labor AMS facility. *Radiocarbon* **40**: 239-245 (1998).
3. Grootes, PM., Nadeau, M-J. & Rieck, A. <sup>14</sup>C-AMS at the Leibniz-Labor: radiometric dating and isotope research. *Nuclear Instruments and Methods in Physics Research Section B: Beam Interactions with Materials and Atoms* **223**: 55-61 (2004).
4. Sieper, H-P. *et al.* A measuring system for the fast simultaneous isotope ratio and elemental analysis of carbon, hydrogen, nitrogen and sulfur in food commodities and other biological material. *Rapid Commun Mass Sp.* **20**: 2521-2527 (2006).
5. Szpak, P. Fish bone chemistry and ultrastructure: implications for taphonomy and stable isotope analysis. *J Archaeol Sci* **38**: 3358-3372 (2011).
6. Ward, GK. & Wilson, SR. Procedures for comparing and combining radiocarbon age-determinations - a critique. *Archaeometry* **20**: 19-31 (1978).
7. Fernandes, R., Grootes, P., Nadeau, M-J. & Nehlich, O. Quantitative diet reconstruction of a Neolithic population using a Bayesian mixing model (FRUITS): The case study of Ostorf (Germany). *Am J Phys Anthropol* **158**: 325-340 (2015).
8. Jørkov, MLS., Heinemeier, J. & Lynnerup, N. The petrous bone—A new sampling site for identifying early dietary patterns in stable isotopic studies. *Am J Phys Anthropol* **138**: 199-209 (2009).
9. Ramsey, CB. Bayesian analysis of radiocarbon dates. *Radiocarbon* **51**: 337-360 (2009).
10. Reimer, PJ. *et al.* IntCal13 and Marine13 radiocarbon age calibration curves 0-50,000 years cal BP. *Radiocarbon* **55**: 1869-1887 (2013).
11. Ramsey, CB. Methods for summarizing radiocarbon datasets. *Radiocarbon* **59**: 1809-1833 (2017).
